# Supplementary material for: Design of a magnetic Fenton-like catalyst by decorating diamond-shaped MIL-88A with Chenopodium-derived biochar for nitrophenol degradation: optimization and mechanistic insights
Source: Royal Society of Chemistry journal article supplement (doi:10.1039/d5ra02562a), 2025-01-01
Supplement: d5ra02562a1.pdf [file d5ra02562a1.pdf]

## **Supplementary Information**

## **Text S1.**

Powder X-Ray Diffraction (PXRD-MAC Science M03XHF, XRD) to scrutinize crystallite phase of the samples. In addition, the morphologies of the fabricated samples were studied by Scanning Electron Microscopy (S4800-Hitachi, SEM). Fourier Transform Infrared Spectrometer (Shimadzu-8400 S, Japan, FTIR) was used to define the functional groups of the samples. The surfaces charges were determined by Zeta Potential (Malvern, ZP), and X-Ray Photoelectron Spectroscopy assured the elemental composition of the samples (Thermo-Fisher Sci., XPS). Vibrating Sample Magnetometer (VSM-8600, Lake Shore, USA) was utilized to measure the magnetic properties of the composite.
